# Supplementary material
Source: PubMed Central journal article supplement (PMC2814387)
Supplement: mt2009184x2.pdf [file mt2009184x2.pdf]

10 20 30 40 50 60 70  
CAP2 MAADGYLPDWLEDTLS EGI RQWWKLPKPPPKPAERHKDDSRGLVLPGYKYLGPFNGLDKGEPVNEADA  
CAP6 ..... N ..... E ..... D ..... A . K . . ANQQKQ . . G ..... A .....  
ShH7 .....  
2H22 .....  
ShH13 .....  
ShH18 .....  
ShH19 ..... E . T . . . A . K . . ANQQKQ . . G ..... G ..... A .....  
ShH21 .....  
ShH22 .....  
CAP1 ..... N ..... E ..... D ..... A . K . . ANQQKQ . . G ..... A .....  
CAP8 ..... N ..... E . A . . . A . K . . ANQQKQ . . G ..... A .....  
CAP9 ..... N ..... E . A . . . A . Q . . ANQQ . Q . NA ..... G ..... A .....

80 90 100 110 120 130 140  
CAP2 AALEHDKAYDRQLDSGDNPYLKYNHADA EFQERLKEDTS FGGNLGRAV FQAKKRVLEPLGLV EEPVKTAP  
CAP6 ..... Q . KA ..... R ..... Q ..... F ..... GA .....  
ShH7 ..... R .....  
2H22 .....  
ShH13 ..... Q . KA ..... GA .....  
ShH18 .....  
ShH19 ..... Q . KA ..... GA .....  
ShH21 .....  
ShH22 ..... KA ..... R .....  
CAP1 ..... Q . KA ..... R ..... Q ..... GA .....  
CAP8 ..... Q . QA ..... R ..... Q ..... GA .....  
CAP9 ..... Q . KA ..... L ..... AA .....

150 160 170 180 190 200 210  
CAP2 GKRRPVEHSPVE - PDSSSGTGKAGQQPARKRLNFGQTGDADSVDPDPQPLGQPPAAPSGLGTNTMATGSGA  
CAP6 ..... Q . Q - E ..... I . T ..... K ..... SE ..... E . T . AAV . PT . . S . G . .  
ShH7 .....  
2H22 .....  
ShH13 ..... P . QRS ..... T . I . K ..... SE ..... E . T . AAV . PT . . S . G . .  
ShH18 ..... P ..... S ..... G .....  
ShH19 ..... P . QRS ..... T . I . K ..... SE ..... E . T . AAV . PT . . A . G . .  
ShH21 .....  
ShH22 ..... P ..... S .....  
CAP1 ..... Q . Q - E ..... I . T ..... K ..... SE ..... E . T . AAV . PT . . S . G . .  
CAP8 ..... P . QRS ..... T . I . K ..... SE ..... E ..... V . P . . A . G . .  
CAP9 ..... Q . Q - E ..... A . I . S . A . . K ..... TE ..... I . E ..... V . SL . . S . G . .

220 230 240 250 260 270 280  
CAP2 PMADNNEGADGVGNSSGNWHCDSTWMGDRVITTTSTRTWALPTYNNHLYKQIS - SQS - GASNDNHYFGYST  
CAP6 ..... A ..... L ..... A . T .....  
ShH7 .....  
2H22 .....  
ShH13 ..... A ..... L ..... A . T .....  
ShH18 .....  
ShH19 ..... S ..... Q . L ..... A . T ..... D .....  
ShH21 .....  
ShH22 .....  
CAP1 ..... A ..... L ..... A . T .....  
CAP8 ..... S ..... L ..... NGT . G . . T . . T .....  
CAP9 ..... V ..... S ..... Q . L ..... N . T . G . S . . A .....

290 300 310 320 330 340 350  
CAP2 PWGYFDNFNRHFCHFS PRDWQLINNNWGF RPKRLNFKLFNIQVKEVTQNDGTTTIANNLTSTVQVFTDSE  
CAP6 ..... T . . V ..... S .....  
ShH7 .....  
2H22 .....  
ShH13 ..... T . . V ..... S .....  
ShH18 .....  
ShH19 .....  
ShH21 ..... D .....  
ShH22 .....

CAP1 ..... T . . . V . . . . . S . . .  
CAP8 ..... S . . . . . E . . . K . . . . . I . . . . .  
CAP9 ..... D . N . V K . . . . . D

360 370 380 390 400 410 420

CAP2 YQLPYVLGSAHQGCLPPFPADVFMVPQYGYLTLNNGSQAVGRSSFFYCLEYFPSQMLRTGNNFTFSYTFED  
CAP6 ..... I .....  
ShH7 .....  
2H22 .....  
ShH13 ..... I .....  
ShH18 .....  
ShH19 .....  
ShH21 .....  
ShH22 .....  
CAP1 ..... I ..... E  
CAP8 ..... I ..... Q . T . . .  
CAP9 ..... E . . . . . I . . . . . D . . . . . Q . . . E . N

430 440 450 460 470 480 490

CAP2 VPFHSSYAHSQSLDRMLNPLIDQYLYLSRTNTPSGTTTQSRRLQFSQAGASDIRDQSRNWLPGPCYRQQR  
CAP6 ..... N . . QNQ . . SAQNKD . L . . RGSPAGMSV . PK . . . . .  
ShH7 .....  
2H22 .....  
ShH13 ..... N . . QNQ . . SAQNKD . L . . RGSPAGMSV . PK . . . . .  
ShH18 .....  
ShH19 .....  
ShH21 .....  
ShH22 .....  
CAP1 ..... N . . QNQ . . SAQNKD . L . . RGSPAGMSV . PK . . . . .  
CAP8 ..... Q . TG . . ANTQT . G . . G . PNTMAN . AK . . . . .  
CAP9 ..... K . IN - GSGQN . QT . K . . V . . P . NMAV . G . . YI . . . S . . .

500 510 520 530 540 550 560

CAP2 VSKTSA DNNNSEYSWTGATKYHLNGRDSLVPNGPAMASHKDDDEEKFFPQSGVLI FGKQGS EKTNV D IEKV  
CAP6 ..... KT . . . . . NFT . . . . . S . N . . . . . E . II . . . . . T . . . . . KD . . . . . M . . . . . ESAGAS . TALDN .  
ShH7 .....  
2H22 .....  
ShH13 ..... KT . . . . . NFT . . . . . S . N . . . . . E . II . . . . . T . . . . . KD . . . . . M . . . . . ESAGAS . TALDN .  
ShH18 ..... H .....  
ShH19 .....  
ShH21 ..... H .....  
ShH22 ..... H .....  
CAP1 ..... KT . . . . . NFT . . . . . S . N . . . . . E . II . . . . . T . . . . . D . . . . . M . . . . . ESAGAS . TALDN .  
CAP8 ..... T . TGQ . . . . . NFA . . AG . . . . . N . A . . . . . I . . . . . T . . . . . R . . . . . SN . I . . . . . NAARD . A . YSD .  
CAP9 ..... T . VTQ . . . . . FA . P . . SSWA . . . . . N . M . . . . . . . . . . EG . DR . . . . . L . S . . . . . TGRD . . . AD . .

570 580 590 600 610 620 630

CAP2 MITDEEEI RTTNPVATEQYGSVSTNLQRGNRQAATADVNTQGVLPGMVWQDRDVYLQGP I WAKI PHTDGH  
CAP6 ..... KA . . . . . RF . T . AV . . . . . SSSTDP . . G . . HVM . A . . . . .  
ShH7 ..... L .....  
2H22 ..... L .....  
ShH13 ..... KA . . . . . RF . T . AV . . . . . SSSTDP . . E . . HVM . A . . . . .  
ShH18 ..... L .....  
ShH19 ..... L .....  
ShH21 ..... L .....  
ShH22 ..... L .....  
CAP1 ..... KA . . . . . RF . T . AV . F . SSSTDP . . G . . HAM . A . . . . .  
CAP8 ..... L . S . . . . . K . . . . . E . . I . AD . . . . . QQ . TAPQIGT . . S . A . . . . . N . . . . .  
CAP9 ..... N . . . . . K . . . . . S . . Q . A . . H . SAQA . . Q . GW . QN . . I . . . . .

640 650 660 670 680 690 700

CAP2 FHPSPLMGGFGLKHPPPQILIKNTVPANPSTTFFSAAKFASFITQYSTGQVSVEIEWELQKENS KRWNPE  
CAP6 ..... PAE . . . . . T . . . . .  
ShH7 ..... V .....  
2H22 ..... V .....  
ShH13 ..... N . . . . . PAE . . . . . T . . . . .

ShH18  
 ShH19  
 ShH21  
 ShH22  
 CAP1  
 CAP8  
 CAP9

```

    . . . . . N . . . . . P A E . . . T .
    . . . . . M . . . . . D P . . N Q S . L N .
    . . . . . M . . . . . D P . A . N K D . L N .
  
```

CAP2  
 CAP6  
 ShH7  
 2H22  
 ShH13  
 ShH18  
 ShH19  
 ShH21  
 ShH22  
 CAP1  
 CAP8  
 CAP9

```

    . . . . . 710 . . . . . 720 . . . . . 730 . . . . .
    I Q Y T S N Y N K S V N V D F T V D T N G V Y S E P R P I G T R Y L T R N L
    V . . . . . A . . A . . . . . N . . L . T . . . . . P .
    . . . . . I . . . . .
    . . . . . I . . . . .
    V . . . . . A . . A . . . . . N . . L . T . . . . .
    . . . . . I . . . . .
    . . . . . I . . . . .
    . . . . . I . . . . .
    . . . . . I . . . . .
    V . . . . . A . . A . . . . . N . . L . T . . . . . P .
    . . . . . Y . . T S . . . A . N . E . . . . .
    . . . . . Y . . N . . E . A . N . E . . . . .
  
```
