# Supplementary material
Source: PubMed Central journal article supplement (PMC2814387)
Supplement: mt2009184x6.pdf [file mt2009184x6.pdf]

| Clone | Sequence                         |
|-------|----------------------------------|
| AAV2  | ~ <sup>585</sup> RGNR~           |
| HA8   | ~ <sup>585</sup> RGNLARTKQAQDAR~ |
| HA10  | ~ <sup>585</sup> RGNLALPTGAKTAR~ |
| HA15  | ~ <sup>585</sup> RGNLATSPTSRTAR~ |
| HA16  | ~ <sup>585</sup> RGNLASDTTQRNAR~ |
| HA17  | ~ <sup>585</sup> RGNLAPGHGERNAR~ |
| HA18  | ~ <sup>585</sup> RGNLARTPNPPTAR~ |
| HA19  | ~ <sup>585</sup> RGNLASDARHINAR~ |
| HA20  | ~ <sup>585</sup> RGNLASGKPGVSAR~ |
| HA23  | ~ <sup>585</sup> RGNLAVSQGTKVAR~ |
| HA24  | ~ <sup>585</sup> RGNLARNTAGTGAR~ |

Supplemental Table 1. Summary of peptides within selected clones from AAV 7mer library.
