# Supplementary material
Source: PubMed Central journal article supplement (PMC2814387)
Supplement: mt2009184x7.pdf [file mt2009184x7.pdf]

| Name      | Sequence                                                                                                                                              |
|-----------|-------------------------------------------------------------------------------------------------------------------------------------------------------|
| CAP For   | 5'-CATGGGAAAGGTGCCAGACG-3'                                                                                                                            |
| CAP Rev   | 5'-CGCAGAGACCAAAGTTCAACTGA-3'                                                                                                                         |
| 7mer For  | 5'-GGAGGGCTAGCA(NNK) <sub>7</sub> GCTAGCAAAGCGGGGGGAGAGTGAGG-3'                                                                                       |
| 7mer Rev  | 5'-CCTCACTCTCCCCCGCT-3'                                                                                                                               |
| Loop1 Rev | 5'- AATTTGTTTGTAGAGGTGGTTGTTGTAGGTGGG-3'                                                                                                              |
| Loop1 For | 5'-<br>AACAACCACCTCTACAAACAAATTTCCNNKNNKNNKNNKNNKNNKNN<br>KNNKGACAATCACTACTTTGGCTACAGCACCC-3'                                                         |
| Loop2 Rev | 5'- CAAGTAATACAGGTACTGGTCGATGAGAGG-3'                                                                                                                 |
| Loop2 For | 5'-<br>CGACCAGTACCTGTATTACTTGNNKNNKACTNKNKNNKNNKRGCGGTNN<br>KNNKNNKNNKNNKNNKCTTCWATTCTCTNNKNNKGGASCTNNKNNKA<br>TRMGCNNKCAGTCTAGGAACTGGCTTCCTGGACCC-3' |
| Loop3 Rev | 5'- CTTCCCAAAGATGAGAACCCCGCTCTGAGG-3'                                                                                                                 |
| Loop3 For | 5'-<br>GGGGTTCTCATCTTTGGGAAGNNKNNKDCNTNNKNNKNNKACNNKNN<br>KMTTNNKNNKGTGATGATTACAGACGAAGAGG-3'                                                         |
| Loop4 Rev | 5'- CTGGAGGTTGGTAGATACAGAACCATACTGCTCCG-3'                                                                                                            |
| Loop4 For | 5'-<br>GGTTCTGTATCTACCAACCTCCAGNNKNNKNNKNNKNNKNSCTNNKNNK<br>NNKNNKGTGAACNNKCAAGGCGTTCTTCCAGGCATGG-3'                                                  |

Supplemental Table 2. Oligonucleotide sequences used to construct libraries.
